# Supplementary material for: Neddylation inhibition protects against ischemic brain injury
Source: Research Square preprint supplement (doi:10.21203/rs.3.rs-263656/v1), 2021-03-11
Supplement: Supplementary file 1 [file 0928591157c774e58d187d70.pdf]

## Supplementary Figures

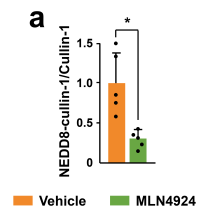

**Supplementary Figure 1. MLN4924 reduces cullin-1 neddylation after ischemic stroke. a** Quantification of cullin-1 neddylation in the ischemic cortex at 24 hours after ischemic stroke in mice treated with vehicle or MLN4924 (n = 5). Data were analyzed using unpaired Student's t test. Values are mean ± SD. \* P < 0.05.

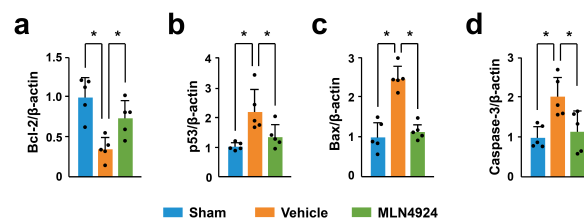

**Supplementary Figure 2. MLN4924 decreases apoptotic responses after ischemic stroke. a-d** Quantitative determinations of antiapoptotic proteins Bcl-2 (a) and proapoptotic proteins p53 (b), Bax (c), and caspase-3(d) in the ipsilateral hemisphere in ischemic mice treated with vehicle or MLN4924 (n = 5). Data were analyzed using one-way ANOVA followed by Bonferroni multiple comparison test. Values are mean ± SD. \* P < 0.05.

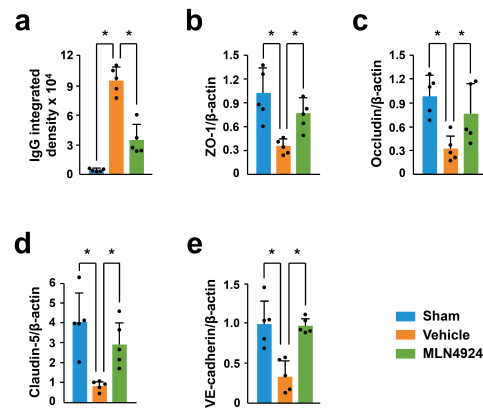

### Supplementary Figure 3. MLN4924 reduces BBB breakdown and preserves BBB

**integrity after ischemic stroke.** **a** Quantitation of IgG perivascular accumulation in the ischemic brain in sham-operated mice and ischemic mice treated with vehicle or MLN4924 (n = 6). **b-e** Quantification of tight junction protein ZO-1 (**b**), occludin (**c**), claudin-5 (**d**) and adherens junction protein VE-cadherin (**e**) in isolated brain microvessels of sham-operated mice and ischemic mice treated with vehicle or MLN4924 (n = 5). Data were analyzed using one-way ANOVA followed by Bonferroni multiple comparison test. Values are mean  $\pm$  SD. \* P < 0.05.

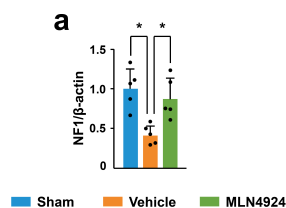

### Supplementary Figure 4. Effects of MLN4924 on stroke-induced NF1 expression. **a**

Quantification of NF1 in the ipsilateral hemisphere in sham-operated mice and ischemic mice treated with vehicle or MLN4924 (n = 5). Data were analyzed using one-way ANOVA followed by Bonferroni multiple comparison test. Values are mean  $\pm$  SD. \* P < 0.05.

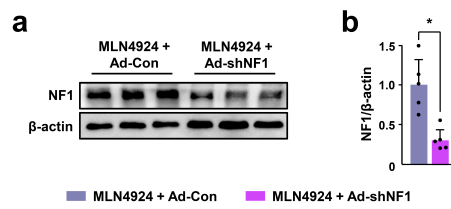

### Supplementary Figure 5. Efficiency of NF1 silencing on NF1 expression. a, b

Representative immunoblots (a) and quantification (b) of NF1 in the ischemic hemisphere in mice treated with MLN4924 and control adenovirus (Ad-Con) or MLN4924 and NF1 shRNA (Ad-shNF1) (n = 6). Data were analyzed using unpaired Student's t test. Values are mean  $\pm$  SD. \* P < 0.05.

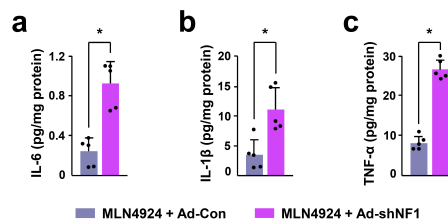

### Supplementary Figure 6. NF1 silencing blocks MLN4924-mediated reduction in proinflammatory cytokines in the ischemic brains. a-c

Quantification of proinflammatory cytokines IL-6 (a), IL-1 $\beta$  (b) and TNF- $\alpha$  (c) by ELISA in ischemic mice treated with MLN4924 and control adenovirus (Ad-Con) or MLN4924 and NF1 shRNA (Ad-shNF1) at 24 hours after stroke (n = 5). Data were analyzed using unpaired Student's t test. Values are mean  $\pm$  SD. \* P < 0.05.

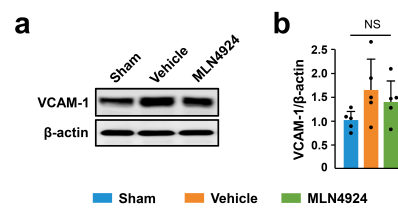

**Supplementary Figure 7. Effects of MLN4924 on VCAM-1 expression after ischemic stroke. a, b** Representative immunoblots (**a**) and quantification (**b**) of VCAM-1 in isolated brain microvessels in sham-operated mice and ischemic mice treated with vehicle or MLN4924 ( $n = 5$ ). Data were analyzed using one-way ANOVA followed by Bonferroni multiple comparison test. Values are mean  $\pm$  SD. NS, not significant.
